# Supplementary material for: Ba7Mn5Cr2O20: charge and chemical order
Source: Royal Society of Chemistry journal article supplement (doi:10.1039/b703877a), 2007-01-01
Supplement: b703877a.pdf [file b703877a.pdf]

|                                                                                                         |             | <i>x</i>  | <i>y</i>  | <i>z</i>   | Fraction        | U <sub>iso</sub> |
|---------------------------------------------------------------------------------------------------------|-------------|-----------|-----------|------------|-----------------|------------------|
| Ba(1)                                                                                                   | 3 <i>a</i>  | 0         | 0         | 0          | 1               | 0.0167           |
| Ba(2)                                                                                                   | 6 <i>c</i>  | 0         | 0         | 0.1449(1)  | 1               | 0.0075           |
| Ba(3)                                                                                                   | 6 <i>c</i>  | 0         | 0         | 0.2297 (1) | 1               | 0.0037           |
| Ba(4)                                                                                                   | 6 <i>c</i>  | 0         | 0         | 0.38726(9) | 1               | 0.0058           |
| Mn(1)                                                                                                   | 6 <i>c</i>  | 0         | 0         | 0.0758(1)  | 1               | 0.0011           |
| Mn(2)                                                                                                   | 6 <i>c</i>  | 0         | 0         | 0.4505(1)  | 1               | 0.0049           |
| Mn(3)                                                                                                   | 3 <i>b</i>  | 0         | 0         | 0.5        | 1               | 0.0033           |
| Cr/Mn(4)                                                                                                | 6 <i>c</i>  | 0         | 0         | 0.6984(1)  | 0.93(1)/0.07(1) | 0.0084           |
| O(1)                                                                                                    | 18 <i>h</i> | 0.1744(2) | 0.8255(2) | 0.09663(5) | 1               | 0.0077           |
| O(2)                                                                                                    | 18 <i>h</i> | 0.1477(2) | 0.8522(2) | 0.47630(4) | 1               | 0.0049           |
| O(3)                                                                                                    | 18 <i>h</i> | 0.4952(3) | 0.5047(3) | 0.37778(4) | 1               | 0.0136           |
| O(4)                                                                                                    | 6 <i>c</i>  | 0         | 0         | 0.3340(1)  | 1               | 0.0429           |
| Space group = R-3m, <i>a</i> = 5.7401(1) Å, <i>c</i> = 50.597(1) Å<br>volume = 1443.08(7)Å <sup>3</sup> |             |           |           |            |                 |                  |

Table S1: Structural details of Ba<sub>7</sub>Mn<sub>5</sub>Cr<sub>2</sub>O<sub>20</sub>

| Cation   | Anion | bond length (Å) | multiplicity |
|----------|-------|-----------------|--------------|
| Mn(1)    | O(1)  | 2.030(3)        | 3            |
|          | O(3)  | 2.328(4)        | 3            |
| Mn(2)    | O(1)  | 1.891(3)        | 3            |
|          | O(2)  | 1.965(4)        | 3            |
| Mn(3)    | O(2)  | 1.89(1)         | 6            |
| Cr/Mn(4) | O(3)  | 1.734(2)        | 3            |
|          | O(4)  | 1.639(7)        | 1            |
| Ba(1)    | O(3)  | 2.822(2)        | 6            |
|          | O(4)  | 3.314(6)        | 6            |
| Ba(2)    | O(1)  | 2.996(5)        | 3            |
|          | O(2)  | 2.878(1)        | 6            |
|          | O(2)  | 2.949(4)        | 3            |
| Ba(3)    | O(1)  | 2.893(1)        | 6            |
|          | O(2)  | 2.714(4)        | 3            |
|          | O(3)  | 3.400(5)        | 3            |
| Ba(4)    | O(1)  | 2.677(4)        | 3            |
|          | O(3)  | 2.911(1)        | 6            |
|          | O(4)  | 2.695(7)        | 1            |

Table S2: Selected bond lengths from Ba<sub>7</sub>Mn<sub>5</sub>Cr<sub>2</sub>O<sub>20</sub>.
